# Supplementary material for: Single leg vertical jump performance identifies knee function deficits at return to sport after ACL reconstruction in male athletes
Source: PubMed Central journal article supplement (PMC9016240; doi:10.1136/bjsports-2021-104692), 2022-02-08
Supplement: bjsports-2021-104692supp001.pdf [file bjsports-2021-104692supp001.pdf]

**Supplementary file 1.** Joint work percentage contribution during the single leg vertical jump and the single leg drop jump

|                                 |             |             |             | Involved-Uninvolved |             | Involved-Controls |             | Uninvolved-Controls |   |
|---------------------------------|-------------|-------------|-------------|---------------------|-------------|-------------------|-------------|---------------------|---|
|                                 | Involved    | Uninvolved  | Controls    | p value             | d           | p value           | d           | p value             | d |
| <b>Single leg vertical jump</b> |             |             |             |                     |             |                   |             |                     |   |
| <b>Propulsion</b>               |             |             |             |                     |             |                   |             |                     |   |
| <b>Work contribution%</b>       |             |             |             |                     |             |                   |             |                     |   |
| Hip                             | 35.97±8.52  | 30.13±7.42  | 32.49±5.35  | <b>&lt;0.001</b>    | <b>0.73</b> | 0.24              |             | 0.51                |   |
| Knee                            | 28.81±7.57  | 34.20±6.52  | 33.85±6.54  | <b>0.001</b>        | <b>0.78</b> | <b>0.043</b>      | <b>0.77</b> | 0.98                |   |
| Ankle                           | 35.22±7.15  | 35.68±5.34  | 33.65±5.09  | 0.90                |             | 0.73              |             | 0.57                |   |
| <b>Landing</b>                  |             |             |             |                     |             |                   |             |                     |   |
| <b>Work contribution%</b>       |             |             |             |                     |             |                   |             |                     |   |
| Hip                             | 38.58±13.92 | 33.63±12.0  | 30.24±9.62  | <b>0.045</b>        | <b>0.38</b> | 0.05              |             | 0.60                |   |
| Knee                            | 29.47±9.33  | 32.97±8.13  | 34.45±9.98  | 0.16                |             | 0.17              |             | 0.85                |   |
| Ankle                           | 31.95±13.78 | 33.40±12.48 | 35.31±13.58 | 0.67                |             | 0.63              |             | 0.84                |   |
| <b>Single leg drop jump</b>     |             |             |             |                     |             |                   |             |                     |   |
| <b>Absorption</b>               |             |             |             |                     |             |                   |             |                     |   |
| <b>Work contribution%</b>       |             |             |             |                     |             |                   |             |                     |   |
| Hip                             | 33.59±8.18  | 24.57±6.86  | 24.78±7.49  | <b>&lt;0.001</b>    | <b>1.19</b> | <b>&lt;0.001</b>  | <b>1.18</b> | 0.99                |   |
| Knee                            | 32.98±7.68  | 38.92±5.43  | 35.28±9.50  | <b>0.004</b>        | <b>0.89</b> | 0.58              |             | 0.26                |   |
| Ankle                           | 33.43±7.99  | 36.51±8.16  | 39.94±11.39 | 0.16                |             | 0.07              |             | 0.45                |   |
| <b>Generation</b>               |             |             |             |                     |             |                   |             |                     |   |
| <b>Work contribution%</b>       |             |             |             |                     |             |                   |             |                     |   |
| Hip                             | 30.89±6.04  | 21.42±6.73  | 22.80±5.22  | <b>&lt;0.001</b>    | <b>1.48</b> | <b>&lt;0.001</b>  | <b>1.55</b> | 0.86                |   |
| Knee                            | 29.65±6.17  | 38.52±4.83  | 35.94±5.49  | <b>&lt;0.001</b>    | <b>1.60</b> | <b>0.001</b>      | <b>1.15</b> | 0.26                |   |
| Ankle                           | 39.45±5.70  | 40.05±4.80  | 41.26±6.68  | 0.73                |             | 0.56              |             | 0.77                |   |

For the ACLR athletes, data are presented for both the reconstructed ('involved') and contralateral ('uninvolved') leg along with one (randomly selected) leg of the control subjects ('Controls') as mean±SD. The between-group comparisons show p values, and effect sizes (d) only where p<.05. **Bold** indicates statistically significant differences and their respective effect sizes.
